# Supplementary material for: Women Skin Microbiota Modifications during Pregnancy
Source: MDPI journal article supplement (doi:10.3390/microorganisms12040808), 2024-04-17
Supplement: s1 [file s1]

## Supplementary Material

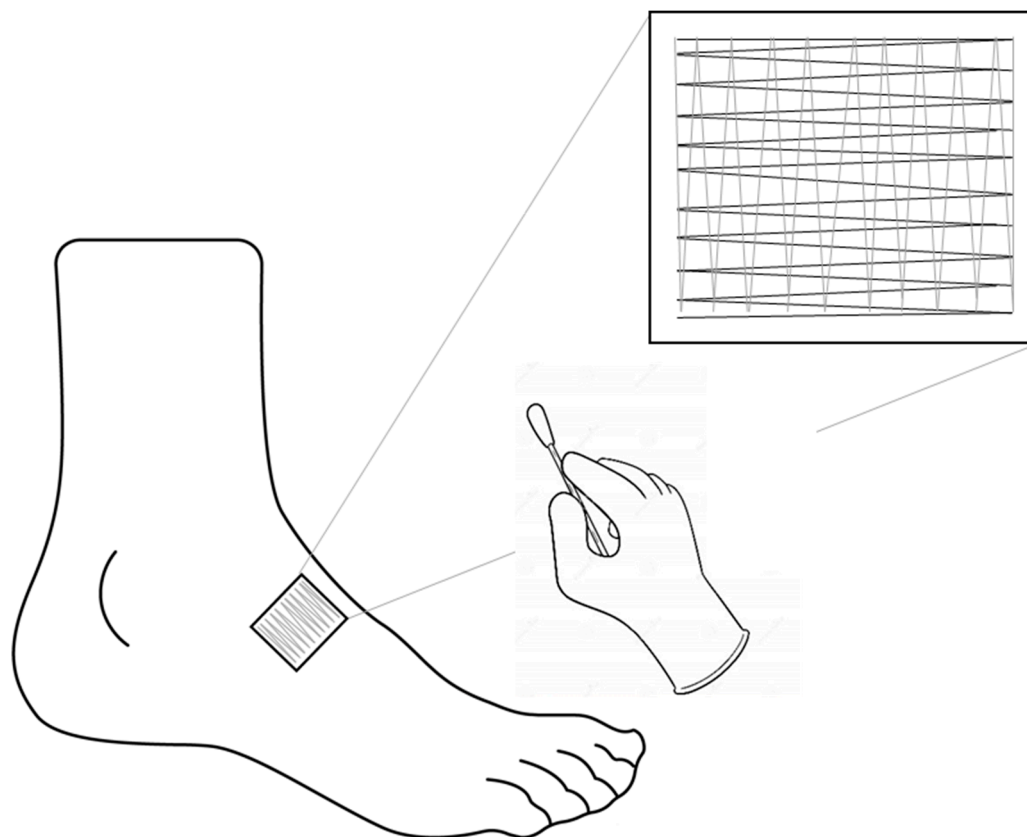

**Supplementary Figure S1.** Bacterial collection site and Z-stroke manner swabbing method. The sterile wet swab was softly wiped twice, 10x horizontal and 10x vertical, for all sample collected.
