# Supplementary material for: Women Skin Microbiota Modifications during Pregnancy
Source: Microorganisms. 2024 Apr 17;12(4):808. doi: 10.3390/microorganisms12040808 (PMC11051999; doi:10.3390/microorganisms12040808)
Supplement: Supplementary file 1 [file microorganisms-12-00808-s001.zip]

Archive with 4 entries (4 files):
- Figure S1. Supplementary Data Skin.pdf
- TableS1.xlsx
- TableS2.xlsx
- TableS3.xlsx
