# Supplementary material for: Women Skin Microbiota Modifications during Pregnancy
Source: Microorganisms. 2024 Apr 17;12(4):808. doi: 10.3390/microorganisms12040808 (PMC11051999; doi:10.3390/microorganisms12040808)
Supplement: Supplementary file 1 [file microorganisms-12-00808-s001.zip › TableS1.xlsx]

## Sheet: Differentially abundant taxa
Table S1. Differential abundance analysis results. Differential abundant taxa computed by Aldex2. For each taxa, the highest abundance among the groups was highlighed in green. Corrected p-value < 0.05 and |ES| > 1 were highlighted in bold. wi.ep: Expected P value of Wilcoxon rank test wi.eBH: Expected Benjamini-Hochberg corrected P value of Wilcoxon test, to account for multiple hypothesis rab.a…
GENUS
ALDEX2
	Taxon	wi.ep	wi.eBH	rab.all	rab.win.control	rab.win.trim.III	diff.btw	diff.win	effect	effect.low	effect.high	overlap
Control – Trim-III	k__Bacteria;p__Proteobacteria;c__Alphaproteobacteria;o__Sphingomonadales;f__Sphingomonadaceae;g__Sphingomonas	8.71199e-10	2.80352e-06	9.38468	12.731	7.44092	-5.58119	2.94565	-1.93662	-18.87	-0.272941	0.00184297
	k__Bacteria;p__Proteobacteria;c__Gammaproteobacteria;o__Pseudomonadales;f__Pseudomonadaceae;g__Pseudomonas	3.05367e-08	3.27557e-05	13.1194	10.8382	14.0799	3.53264	2.08222	1.58352	-0.0288074	12.9576	0.029385
	k__Bacteria;p__Proteobacteria;c__Betaproteobacteria;o__Burkholderiales;f__Oxalobacteraceae;g__Janthinobacterium	2.95002e-08	3.27557e-05	11.6862	8.43479	12.9801	4.32482	2.43879	1.70489	-0.0158572	13.767	0.0275485
	k__Bacteria;p__Bacteroidetes;c__Bacteroidia;o__Bacteroidales;f__Rikenellaceae;g__	2.84364e-06	0.00228771	1.48218	10.1891	-1.32333	-11.2751	4.87258	-2.03433	-16.9258	0.769754	0.0579046
	k__Bacteria;p__Firmicutes;c__Clostridia;o__Clostridiales;f__Ruminococcaceae;g__Oscillospira	1.55446e-05	0.0100045	0.670669	7.06671	-1.64714	-9.02099	5.42005	-1.54397	-11.494	0.72707	0.0744486
SPECIES
ALDEX2
	Taxon	wi.ep	wi.eBH	rab.all	rab.win.control	rab.win.trim.III	diff.btw	diff.win	effect	effect.low	effect.high	overlap
Control – Trim-III	k__Bacteria;p__Proteobacteria;c__Alphaproteobacteria;o__Sphingomonadales;f__Sphingomonadaceae;g__Sphingomonas;s__yabuuchiae	1.52202e-09	6.36811e-06	4.83698	12.7904	-1.05842	-13.1628	4.96801	-2.52833	-19.8031	-0.485064	0.00551629
	k__Bacteria;p__Proteobacteria;c__Betaproteobacteria;o__Burkholderiales;f__Oxalobacteraceae;g__Janthinobacterium;s__lividum	1.11706e-08	1.8917e-05	11.6722	8.3062	13.0575	4.86395	3.53362	1.35964	0.0603326	19.6805	0.0165294
	k__Bacteria;p__Proteobacteria;c__Gammaproteobacteria;o__Pseudomonadales;f__Pseudomonadaceae;g__Pseudomonas;s__	1.35638e-08	1.8917e-05	12.4411	9.29019	13.8028	4.42247	2.37393	1.66522	0.0499194	15.3101	0.0202024
	k__Bacteria;p__Proteobacteria;c__Gammaproteobacteria;o__Pseudomonadales;f__Pseudomonadaceae;g__Pseudomonas;s__veronii	2.84638e-08	2.97731e-05	9.81083	2.26488	11.0317	8.4016	5.0062	1.4699	0.0280842	20.3655	0.0229572
	k__Bacteria;p__Bacteroidetes;c__Bacteroidia;o__Bacteroidales;f__Rikenellaceae;g__;s__	4.08357e-06	0.00341713	1.55696	10.2888	-1.32689	-11.3414	4.90025	-2.03012	-16.589	0.711738	0.0587697
	k__Bacteria;p__Firmicutes;c__Clostridia;o__Clostridiales;f__Ruminococcaceae;g__Oscillospira;s__	1.63407e-05	0.0113949	0.915149	7.20579	-1.47516	-9.03628	5.29714	-1.5818	-11.4706	0.889694	0.0872361
	k__Bacteria;p__Proteobacteria;c__Gammaproteobacteria;o__Pseudomonadales;f__Pseudomonadaceae;g__Pseudomonas;s__fragi	6.38123e-05	0.0381416	6.68058	0.664604	8.59976	7.48662	6.4138	1.05008	-0.807384	12.4613	0.117647
	k__Bacteria;p__Bacteroidetes;c__Bacteroidia;o__Bacteroidales;f__Bacteroidaceae;g__Bacteroides;s__plebeius	8.11671e-05	0.0424504	2.32896	7.86025	-0.711079	-7.7227	5.68767	-1.19973	-9.41115	1.30536	0.11489
