# Supplementary material for: Women Skin Microbiota Modifications during Pregnancy
Source: Microorganisms. 2024 Apr 17;12(4):808. doi: 10.3390/microorganisms12040808 (PMC11051999; doi:10.3390/microorganisms12040808)
Supplement: Supplementary file 1 [file microorganisms-12-00808-s001.zip › TableS2.xlsx]

## Sheet: Differentially enriched pathway
Table S2. Functional profiling results. Differentially enriched pathways computed by Aldex2. Corrected p-value < 0.05 and |ES| > 1 were highlighted in bold. For each pathway that met both the p-value and ES criteria, the Metacyc ID was evidenced in orange while the highest abundance among the groups was evidenced in green. wi.ep: Expected P value of Wilcoxon rank test wi.eBH: Expected Benjamini-H…
ALDEX2
			Wilcoxon test		median clr value					diff.btw/max(diff.win)
	Pathway	Description	wi.ep	wi.eBH	rab.all	rab.win.control	rab.win.trim.III	diff.btw	diff.win	effect	effect.low	effect.high	overlap
Control – Trim-I	PWY-6507	4-deoxy-L-threo-hex-4-enopyranuronate degradation	0.00109393	0.04083294	1.55103	1.83223	-0.407114	-1.99252	1.91237	-0.950163	-9.48481	1.34594	0.1809
	PWY-1361	benzoyl-CoA degradation I (aerobic)	0.000311659	0.01869953	-5.96423	-3.23393	-11.5958	-7.09642	7.79804	-0.891611	-9.38874	1.81034	0.143382
	PWY-6107	chlorosalicylate degradation	0.00121687	0.04208136	-4.54347	-2.58478	-5.46629	-2.732	4.34423	-0.651709	-12.9783	1.4942	0.184573
	ARGDEG-PWY	superpathway of L-arginine, putrescine, and 4-aminobutanoate degradation	0.000689733	0.03123129	-2.38797	-3.01567	-1.82097	1.14876	1.53904	0.645279	-1.01279	12.9999	0.169881
	ORNARGDEG-PWY	superpathway of L-arginine and L-ornithine degradation	0.000698261	0.03123129	-2.38697	-3.01474	-1.81535	1.13712	1.52306	0.652766	-1.06533	16.9963	0.170799
	PWY-7315	dTDP-N-acetylthomosamine biosynthesis	0.00127519	0.0423915	-0.854997	-1.80463	-0.199889	1.80431	2.08795	0.748995	-3.5933	6.90922	0.186581
	AEROBACTINSYN-PWY	aerobactin biosynthesis	9.63922e-05	0.008656384	-7.55403	-9.0342	-5.63254	3.97897	4.96924	0.843432	-1.02276	10.1245	0.132353
	GLUCOSE1PMETAB-PWY	glucose and glucose-1-phosphate degradation	0.000972859	0.03798784	1.85017	1.36069	2.61618	1.17716	1.19461	0.856276	-3.72159	8.41695	0.176471
	DHGLUCONATE-PYR-CAT-PWY	glucose degradation (oxidative)	0.0010139	0.0389717	-1.29291	-1.86975	1.30128	3.05726	2.91198	0.875047	-1.29202	12.6551	0.186581
	PWY-5181	toluene degradation III (aerobic) (via p-cresol)	0.00123165	0.04208136	0.47532	0.0436038	1.31481	1.26365	1.38026	0.878435	-1.27108	7.65919	0.191001
	PWY0-1338	polymyxin resistance	0.000381493	0.0219878	-1.89513	-2.69573	0.551105	2.90508	2.51481	1.0866	-1.10701	12.3207	0.153493
	PWY-7431	aromatic biogenic amine degradation (bacteria)	0.000139354	0.009814022	1.06877	0.0666156	2.12446	1.74347	1.36603	1.09207	-1.73297	12.6622	0.129596
	ORNDEG-PWY	superpathway of ornithine degradation	7.64797e-07	0.000235175	-1.30397	-2.42271	0.0223266	2.61713	2.15365	1.13038	-0.170888	21.1234	0.0560148
			Wilcoxon test		median clr value					diff.btw/max(diff.win)
	Pathway	Description	wi.ep	wi.eBH	rab.all	rab.win.control	rab.win.trim.III	diff.btw	diff.win	effect	effect.low	effect.high	overlap
Control – Trim-II	PWY0-1297	superpathway of purine deoxyribonucleosides degradation	0.00014473	0.009889849	2.40492	2.74418	2.13354	-0.609192	0.627537	-0.914774	-11.2798	0.905997	0.134068
	KETOGLUCONMET-PWY	ketogluconate metabolism	0.000623423	0.02893623	-0.764325	-0.264394	-1.26223	-1.08012	1.20874	-0.790787	-9.91793	3.32051	0.157169
	PWY-1361	benzoyl-CoA degradation I (aerobic)	0.000441798	0.02362656	-5.17646	-3.23263	-10.6706	-6.17163	7.57489	-0.777915	-10.3339	1.82469	0.155188
	PWY-6609	adenine and adenosine salvage III	0.000498952	0.02504943	2.82133	3.02364	2.58951	-0.522993	0.68155	-0.755859	-7.26012	1.31986	0.167126
	PWY-6992	1,5-anhydrofructose degradation	0.00121023	0.04208136	-2.51509	-3.98365	0.187155	3.57119	3.56019	0.892863	-1.30781	13.6026	0.189164
	PWY-7373	superpathway of demethylmenaquinol-6 biosynthesis II	0.000176621	0.01174292	-5.95829	-9.18776	-4.2786	5.25418	5.27996	0.910586	-0.715106	8.91247	0.144302
	DHGLUCONATE-PYR-CAT-PWY	glucose degradation (oxidative)	0.00038434	0.0219878	-1.08356	-1.85992	1.61117	3.0487	2.62148	0.985205	-1.19035	14.4563	0.166208
	PWY-7431	aromatic biogenic amine degradation (bacteria)	0.00040823	0.02282379	0.976365	0.0697759	2.25751	1.50213	1.56114	0.987097	-1.71658	11.4989	0.161616
	PWY0-1338	polymyxin resistance	0.00080509	0.03429359	-1.97802	-2.6926	0.869552	3.04714	2.62097	1.02561	-1.33556	12.1876	0.16636
	AEROBACTINSYN-PWY	aerobactin biosynthesis	5.67193e-06	0.00099664	-7.08484	-9.03757	-5.23875	4.98533	4.84481	1.03153	-0.431516	11.349	0.0781251
	ORNDEG-PWY	superpathway of ornithine degradation	1.18117e-06	0.0002885544	-1.1731	-2.42394	0.435109	2.72281	2.19119	1.06344	-0.264299	19.9746	0.0579046
			Wilcoxon test		median clr value					diff.btw/max(diff.win)
	Pathway	Description	wi.ep	BH.pval	rab.all	rab.win.control	rab.win.trim.III	diff.btw	diff.win	effect	effect.low	effect.high	overlap
Control – Trim-III	PWY-6507	4-deoxy-L-threo-hex-4-enopyranuronate degradation	3.47791e-09	2.01891e-06	-0.0349499	1.84498	-1.1726	-3.04597	1.39425	-2.17104	-18.6338	-0.265329	0.0110201
	PWY-5178	toluene degradation IV (aerobic) (via catechol)	1.29028e-06	0.0002885544	-0.646342	0.115717	-2.00597	-1.93172	1.20874	-1.49692	-16.3392	0.537774	0.0688706
	GALACT-GLUCUROCAT-PWY	superpathway of hexuronide and hexuronate degradation	1.54677e-06	0.000311684	0.638189	1.67796	0.21182	-1.34401	0.832168	-1.44614	-10.5127	0.325577	0.0670957
	PWY-7371	1,4-dihydroxy-6-naphthoate biosynthesis II	1.55063e-05	0.002243849	-1.8915	-0.617798	-2.9105	-2.14657	1.5769	-1.25887	-8.96417	1.02544	0.112029
	PWY-6957	mandelate degradation to acetyl-CoA	0.000909221	0.03727806	-13.323	-4.18273	-14.9975	-10.7975	6.75774	-1.24991	-13.3678	1.21504	0.140625
	PWY-6263	superpathway of menaquinol-8 biosynthesis II	1.39204e-05	0.002140257	-0.403881	0.763856	-1.45618	-1.95381	1.48336	-1.24841	-10.2501	0.897217	0.0965074
	GALACTUROCAT-PWY	D-galacturonate degradation I	2.05187e-05	0.002804226	1.44172	2.30903	0.865674	-1.37674	1.00093	-1.24466	-10.8973	0.759211	0.10652
	GLUCUROCAT-PWY	superpathway of &beta;-D-glucuronide and D-glucuronate degradation	6.78474e-06	0.001112698	1.00966	1.6913	0.406905	-1.30182	1.06449	-1.17984	-9.9451	0.524496	0.0899909
	PWY-6588	pyruvate fermentation to acetone	3.37329e-05	0.00413178	-1.39819	0.0780935	-1.96504	-1.82745	1.45977	-1.13692	-10.198	0.74497	0.117539
	PWY-1501	mandelate degradation I	0.00111212	0.04083294	-13.3169	-5.6481	-15.0769	-9.71314	7.16391	-1.08291	-10.8134	0.996765	0.150735
	PWY-7374	1,4-dihydroxy-6-naphthoate biosynthesis I	0.000105566	0.008656384	-2.00414	-0.798945	-3.10236	-2.03263	1.77072	-1.06179	-10.558	1.38436	0.136949
	PWY-5677	succinate fermentation to butanoate	7.84901e-05	0.008045235	-3.89915	-3.30808	-5.23646	-2.06359	1.94881	-0.963284	-8.82154	0.772465	0.134191
	PWY-1361	benzoyl-CoA degradation I (aerobic)	0.000101019	0.008656384	-5.96601	-3.23679	-12.6679	-7.84779	7.6756	-0.947224	-11.4647	1.69794	0.131434
	PWY-7242	D-fructuronate degradation	0.000420624	0.02299411	2.21496	2.55033	1.601	-0.918712	0.920074	-0.915926	-9.01245	0.956385	0.156107
	PWY-7003	glycerol degradation to butanol	0.000481046	0.02465361	-0.877986	-0.159461	-1.18705	-1.10593	1.24503	-0.843591	-8.15011	0.960162	0.163603
	P281-PWY	3-phenylpropanoate degradation	0.000573187	0.02802	-2.58952	-1.78615	-3.02597	-1.7658	2.0769	-0.808257	-8.90239	1.97478	0.168962
	P621-PWY	nylon-6 oligomer degradation	8.6981e-05	0.008558933	-5.22872	-3.0769	-6.81253	-4.23166	4.61808	-0.790215	-10.3096	1.47991	0.126722
	PWY-6749	CMP-legionaminate biosynthesis I	5.30482e-05	0.005673855	-3.34768	-2.53167	-5.1376	-2.50865	2.8059	-0.789218	-15.7049	0.668589	0.121212
	P108-PWY	pyruvate fermentation to propanoate I	0.00135333	0.04438925	2.10359	2.47941	1.73937	-0.909691	1.19469	-0.739932	-8.7318	0.940178	0.184573
	PWY-6107	chlorosalicylate degradation	0.000276223	0.01698774	-4.66456	-2.5653	-5.27307	-3.44869	6.00681	-0.673868	-22.6096	1.30844	0.15427
	ORNARGDEG-PWY	superpathway of L-arginine and L-ornithine degradation	0.00120351	0.04208136	-2.31158	-3.01419	-1.73938	1.47573	2.02573	0.597666	-1.27791	11.5199	0.180147
	ARGDEG-PWY	superpathway of L-arginine, putrescine, and 4-aminobutanoate degradation	0.00117447	0.04208136	-2.30141	-3.0151	-1.7338	1.44465	2.03558	0.634431	-1.50182	11.9527	0.203125
	PWY0-845	superpathway of pyridoxal 5'-phosphate biosynthesis and salvage	0.00151621	0.04781904	2.49941	2.2192	2.7021	0.47222	0.601563	0.780181	-1.30642	7.0826	0.189338
	PWY-5971	palmitate biosynthesis II (bacteria and plants)	0.000792275	0.03429359	3.23783	2.763	3.42356	0.636254	0.718871	0.787759	-1.24927	9.29891	0.176309
	PWY-5431	aromatic compounds degradation via &beta;-ketoadipate	0.00058374	0.02802	1.48662	1.15331	2.06909	0.821803	0.978138	0.788746	-1.17287	7.78087	0.177227
	PWY-5417	catechol degradation III (ortho-cleavage pathway)	0.000592293	0.02802	1.48978	1.15696	2.06717	0.814509	0.951226	0.799911	-1.33076	8.8164	0.171717
	PWY-7328	superpathway of UDP-glucose-derived O-antigen building blocks biosynthesis	0.000182236	0.01179741	2.27886	1.65539	2.54087	0.773666	0.761449	0.93344	-4.32215	9.12739	0.143251
	PWY0-1241	ADP-L-glycero-&beta;-D-manno-heptose biosynthesis	0.00110769	0.04083294	1.17956	-0.265273	1.54562	1.64306	1.60253	0.946163	-1.1469	7.59875	0.182736
	PROTOCATECHUATE-ORTHO-CLEAVAGE-PWY	protocatechuate degradation II (ortho-cleavage pathway)	3.52713e-05	0.00413178	1.99395	1.52936	2.5162	1.12466	1.07333	0.968514	-0.924272	9.2922	0.117647
	PYRIDOXSYN-PWY	pyridoxal 5'-phosphate biosynthesis I	0.00011745	0.009320217	2.20899	1.79692	2.70084	0.918012	0.875949	0.973166	-0.931374	8.06746	0.132353
	PWY-5384	sucrose degradation IV (sucrose phosphorylase)	0.00013963	0.009814022	2.08053	1.39662	2.54494	1.15736	0.975447	0.980454	-4.76668	10.1154	0.140625
	AST-PWY	L-arginine degradation II (AST pathway)	0.000927481	0.03740333	1.28811	-0.237773	1.69915	1.8103	1.51951	0.985704	-1.83375	12.5152	0.185662
	PWY-5747	2-methylcitrate cycle II	0.000122805	0.009440607	1.72897	1.33848	2.34244	1.03825	0.980108	1.0016	-1.16749	9.84004	0.143251
	PWY0-321	phenylacetate degradation I (aerobic)	2.90665e-05	0.003763348	0.921292	0.289809	1.53259	1.12854	1.0625	1.02502	-0.73279	7.7622	0.114784
	PPGPPMET-PWY	ppGpp biosynthesis	4.7703e-05	0.005334065	2.42366	1.50046	2.83415	1.20775	1.00222	1.08159	-0.650395	10.3577	0.125
	PWY-7090	UDP-2,3-diacetamido-2,3-dideoxy-&alpha;-D-mannuronate biosynthesis	9.92282e-07	0.0002712238	-1.0506	-3.06304	-0.468901	2.80899	2.24473	1.11484	-0.180571	17.8136	0.0597428
	GLUCOSE1PMETAB-PWY	glucose and glucose-1-phosphate degradation	9.53789e-05	0.008656384	2.20665	1.36523	2.61337	1.28992	1.04212	1.11497	-4.44579	11.8233	0.134068
	PWY-6185	4-methylcatechol degradation (ortho cleavage)	4.55916e-09	2.01891e-06	0.884538	0.102557	1.40125	1.50259	1.00896	1.48023	0.144101	11.163	0.0101112
	ORNDEG-PWY	superpathway of ornithine degradation	4.51095e-10	3.69898e-07	-0.456819	-2.42254	0.529194	3.02159	1.78937	1.54867	0.0779334	25.0523	6.45018e-05
	PWY-7431	aromatic biogenic amine degradation (bacteria)	1.64711e-06	0.000311684	1.53833	0.075534	2.28584	1.97574	1.14207	1.62697	-1.18974	16.7865	0.0670957
	PWY-5181	toluene degradation III (aerobic) (via p-cresol)	7.28226e-08	2.55919e-05	1.04289	0.0438587	1.63737	1.5871	0.942508	1.63976	-0.0622294	15.6965	0.0303312
	PWY-6992	1,5-anhydrofructose degradation	4.92417e-09	2.01891e-06	-1.42462	-3.99495	0.148778	4.07046	2.17087	1.86579	0.112761	18.7751	0.0156112
	DHGLUCONATE-PYR-CAT-PWY	glucose degradation (oxidative)	4.44208e-10	3.69898e-07	0.713602	-1.8634	1.52192	3.4915	1.46665	2.31491	0.204756	22.2976	6.45018e-05
	PWY0-1338	polymyxin resistance	4.40765e-10	3.69898e-07	0.0428349	-2.69271	0.92512	4.03857	1.52342	2.47539	0.5663	19.9104	6.45018e-05
			Wilcoxon test		median clr value					diff.btw/max(diff.win)
	Pathway	Description	wi.ep	BH.pval	rab.all	rab.win.control	rab.win.trim.III	diff.btw	diff.win	effect	effect.low	effect.high	overlap
Trim II – Trim-III	P281-PWY	3-phenylpropanoate degradation	0.000130542	0.009731298	-2.5125	-1.92327	-2.98425	-1.22347	1.3068	-0.893687	-8.99186	1.15787	0.13315
	PWY-6588	pyruvate fermentation to acetone	0.00125005	0.04212487	-1.39153	-1.10734	-1.9203	-0.872937	1.14912	-0.734845	-6.50498	1.30122	0.193015
	P621-PWY	nylon-6 oligomer degradation	0.00085831	0.03578718	-5.23988	-4.131	-6.6714	-3.00129	4.55451	-0.549213	-10.8716	3.73774	0.183824
	PWY0-1415	superpathway of heme biosynthesis from uroporphyrinogen-III	0.000949766	0.03768426	2.44524	2.25764	2.69593	0.430411	0.52174	0.767916	-1.13102	6.30018	0.182904
	P105-PWY	TCA cycle IV (2-oxoglutarate decarboxylase)	0.00139703	0.04521963	3.48123	3.31434	3.66274	0.336726	0.394356	0.788283	-1.69759	6.87271	0.186581
	PWY0-1061	superpathway of L-alanine biosynthesis	0.00146697	0.04686683	3.36705	3.05769	3.5603	0.511905	0.62535	0.801445	-1.23429	6.12363	0.192838
	PWY-6628	superpathway of L-phenylalanine biosynthesis	0.000808548	0.03429359	3.45825	3.20538	3.64029	0.44543	0.495361	0.831103	-1.13664	7.0039	0.170956
	PWY-6630	superpathway of L-tyrosine biosynthesis	0.000452691	0.02369402	3.32751	3.06884	3.54264	0.423137	0.437185	0.9166	-1.1204	8.25001	0.157943
	PWY-6353	purine nucleotides degradation II (aerobic)	0.000201479	0.01270865	3.07565	2.97408	3.24398	0.299149	0.318659	0.923673	-0.771229	8.1225	0.141544
	PWY-7616	methanol oxidation to carbon dioxide	0.000102459	0.008656384	0.807986	-0.0478481	1.21441	1.0399	0.897259	1.10449	-1.01427	8.52615	0.138787
