# Supplementary material for: Women Skin Microbiota Modifications during Pregnancy
Source: Microorganisms. 2024 Apr 17;12(4):808. doi: 10.3390/microorganisms12040808 (PMC11051999; doi:10.3390/microorganisms12040808)
Supplement: Supplementary file 1 [file microorganisms-12-00808-s001.zip › TableS3.xlsx]

## Sheet: Foglio1
Label	degree	Label	degree	Label	degree	Label	degree
Acinetobacter lwoffii	11	Corynebacterium simulans	1	Escherichia coli	3	Propionibacterium acnes	1
Paracoccus marcusii	3	Macrococcus brunensis	4	Sphingomonas yabuuchiae	4	Bacteroides plebeius	2
Propionibacterium acnes	4	Sphingomonas yabuuchiae	6	Haemophilus parainfluenzae	2	Janthinobacterium lividum	2
Kocuria palustris	3	Bacteroides plebeius	8	Kocuria rhizophila	1	Pseudomonas veronii	3
Sphingomonas yabuuchiae	12	Corynebacterium stationis	7	Faecalibacterium prausnitzii	1	Prevotella melaninogenica	3
Bacteroides plebeius	11	Staphylococcus equorum	9	Pseudoxanthomonas mexicana	2	Pseudomonas fragi	5
Faecalibacterium prausnitzii	9	Propionibacterium acnes	3	Brevibacterium aureum	1	Pseudoxanthomonas mexicana	1
Acinetobacter johnsonii	5	Abies homolepis	4	Pseudomonas fragi	7	Faecalibacterium prausnitzii	1
Escherichia coli	9	Paracoccus marcusii	5	Prevotella melaninogenica	4	Kocuria rhizophila	3
Janthinobacterium lividum	13	Acinetobacter lwoffii	3	Pseudomonas veronii	2	Haemophilus parainfluenzae	4
Streptococcus anginosus	10	Bdellovibrio bacteriovorus	2	Streptococcus anginosus	1	Sphingomonas yabuuchiae	1
Roseomonas mucosa	6	Staphylococcus pettenkoferi	2	Brevundimonas diminuta	2
Staphylococcus equorum	2	Jeotgalicoccus psychrophilus	9	Janthinobacterium lividum	2
Bdellovibrio bacteriovorus	1	Faecalibacterium prausnitzii	5	Bacteroides plebeius	4
Abies homolepis	5	Pseudomonas fragi	7	Propionibacterium acnes	2
Pseudomonas veronii	13	Pseudomonas veronii	8
Pseudomonas stutzeri	8	Pseudomonas stutzeri	10
Pseudomonas fragi	10	Janthinobacterium lividum	8
Brevibacterium aureum	6	Kocuria palustris	9
Corynebacterium simulans	9	Acinetobacter johnsonii	7
Prevotella melaninogenica	3	Pseudoxanthomonas mexicana	1
Kocuria rhizophila	3	Brevundimonas diminuta	7
Brevundimonas diminuta	5	Lactobacillus iners	2
Jeotgalicoccus psychrophilus	3	Kocuria rhizophila	2
Macrococcus brunensis	2	Brevibacterium aureum	3
		Escherichia coli	2

## Sheet: Foglio2
Table S3. Co-occurrence networks information. HUB nodes determined by using a connections-based approach. HUBs are defined asd nodes (species) with a number of connections equal or higher the maximum number of connections observed for nodes in all computed networks
	Control		Trim-I		Trim-II		Trim-III
	Connections	HUB	Connections	HUB	Connections	HUB	Connections	HUB
Corynebacterium stationis	--	--	7	HUB	--	--	--	--
Haemophilus parainfluenzae	--	--	--	--	2		4
Lactobacillus iners	--	--	2		--	--	--	--
Pseudoxanthomonas mexicana	--	--	1		2		1
Staphylococcus pettenkoferi	--	--	2		--	--	--	--
Acinetobacter lwoffii	11	HUB	3		--	--	--	--
Bacteroides plebeius	11	HUB	8	HUB	4		2
Corynebacterium simulans	9	HUB	1		--	--	--	--
Escherichia coli	9	HUB	2		3		--
Faecalibacterium prausnitzii	9	HUB	5		1		1
Janthinobacterium lividum	13	HUB	8	HUB	2		2
Pseudomonas fragi	10	HUB	7	HUB	7	HUB	5
Pseudomonas stutzeri	8	HUB	10	HUB	--	--	--	--
Pseudomonas veronii	13	HUB	8	HUB	2		3
Sphingomonas yabuuchiae	12	HUB	6		4		1
Streptococcus anginosus	10	HUB	--	--	1		--
Abies homolepis	5		4		--	--	--	--
Acinetobacter johnsonii	5		7	HUB	--	--	--	--
Bdellovibrio bacteriovorus	1		2		--	--	--	--
Brevibacterium aureum	6		3		1		--
Brevundimonas diminuta	5		7	HUB	2		--
Jeotgalicoccus psychrophilus	3		9	HUB	--	--	--	--
Kocuria palustris	3		9	HUB	--	--	--	--
Kocuria rhizophila	3		2		1		3
Macrococcus brunensis	2		4		--	--	--	--
Paracoccus marcusii	3		5		--	--	--	--
Prevotella melaninogenica	3		--	--	4		3
Propionibacterium acnes	4		3		2		1
Roseomonas mucosa	6		--	--	--	--	--	--
Staphylococcus equorum	2		9	HUB	--	--	--	--
